# Supplementary material for: MAPK6-AKT signaling promotes tumor growth and resistance to mTOR kinase blockade
Source: PubMed Central journal article supplement (PMC8589317; doi:10.1126/sciadv.abi6439), 2021-11-12
Supplement: sciadv.abi6439_sm.pdf [file sciadv.abi6439_sm.pdf]

Supplementary Materials for

**MAPK6-AKT signaling promotes tumor growth and resistance to mTOR  
kinase blockade**

Qinbo Cai, Wolong Zhou, Wei Wang, Bingning Dong, Dong Han, Tao Shen, Chad J. Creighton,  
David D. Moore, Feng Yang\*

\*Corresponding author. Email: [fyang@bcm.edu](mailto:fyang@bcm.edu)

Published 12 November 2021, *Sci. Adv.* 7, eabi6439 (2021)  
DOI: [10.1126/sciadv.abi6439](https://doi.org/10.1126/sciadv.abi6439)

**This PDF file includes:**

Table S1  
Figs. S1 to S5
